# Supplementary material
Source: PubMed Central journal article supplement (PMC9494814)
Supplement: NIHMS1829526-supplement-2.pdf [file NIHMS1829526-supplement-2.pdf]

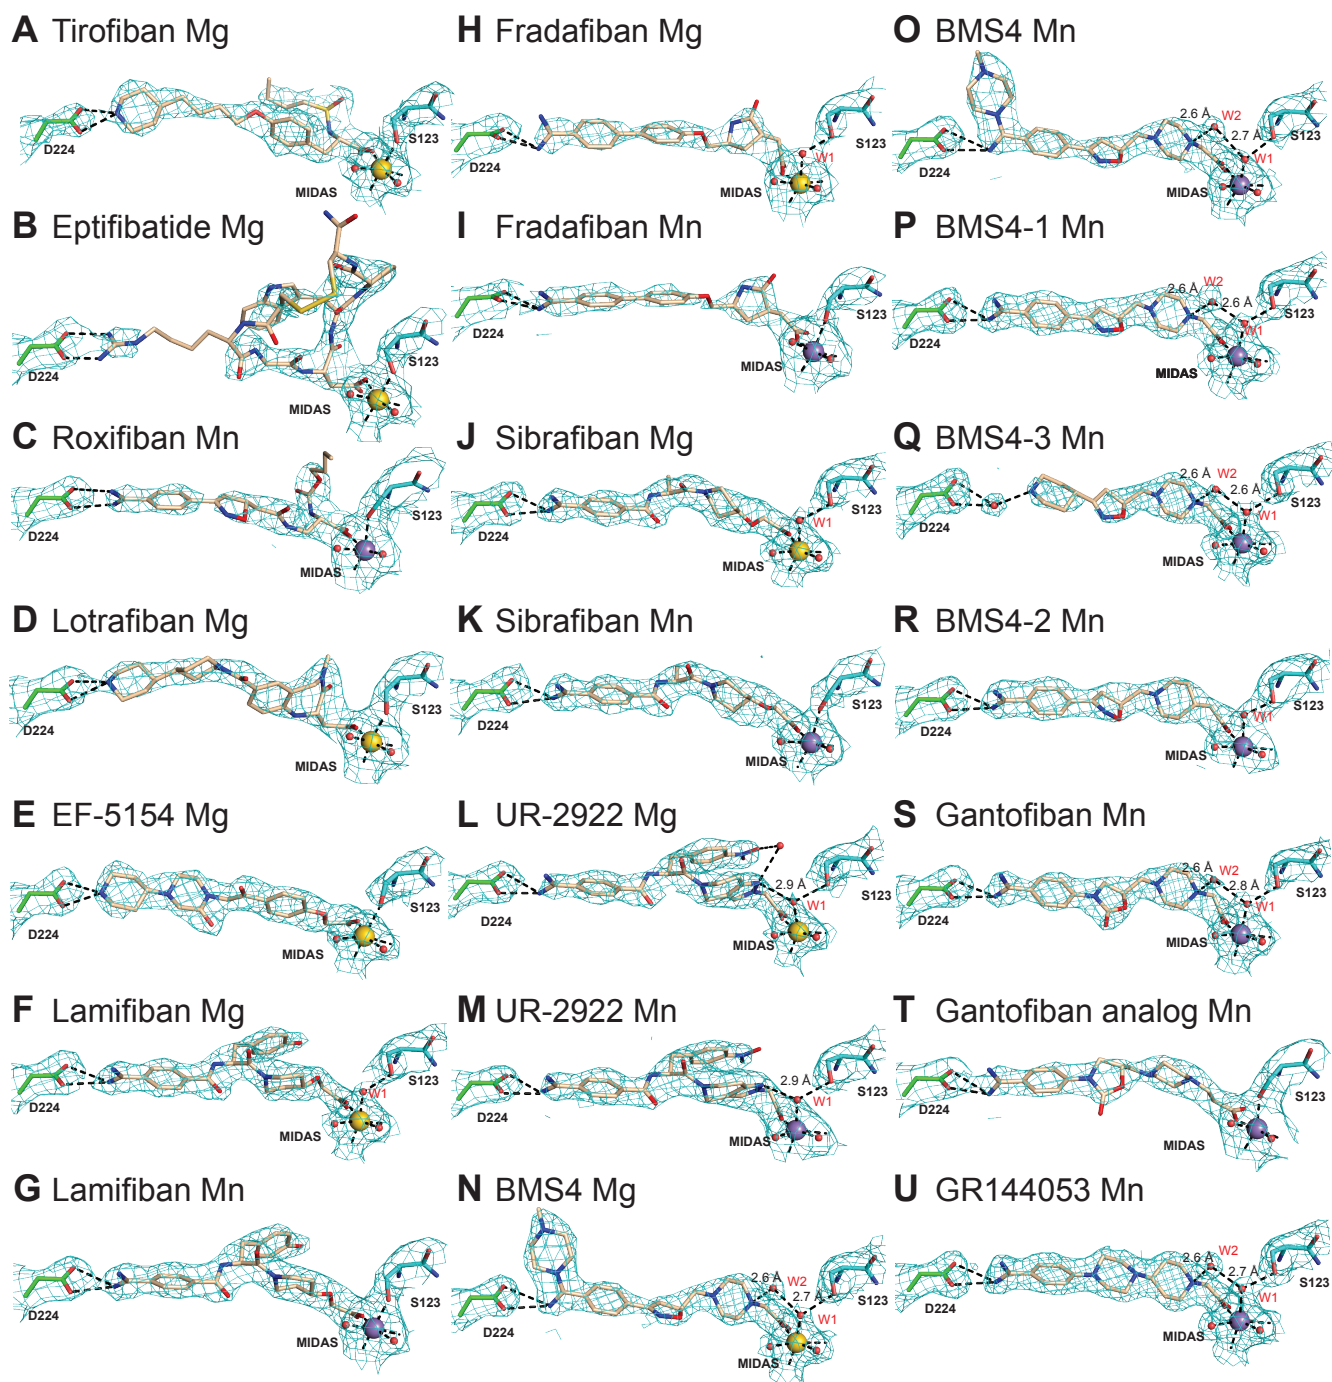

**FIGURE S1. Related to Fig. 3. 2Fo-Fc electron density maps of drugs bound to allβ3 headpiece in the order of their appearance in the main text.** Metal conditions (Mg or Mn) for compound soaking are described in Table S1. Electron density (cyan mesh) is contoured around atoms at 1.5  $\sigma$ . Colors are as in Fig. 2: Mg<sup>2+</sup> and Mn<sup>2+</sup> ions as gold and purple spheres, respectively, and waters as smaller red spheres. Black dashes represent metal coordination and key hydrogen bonds.
