# Supplementary material
Source: PubMed Central journal article supplement (PMC9494814)
Supplement: NIHMS1829526-supplement-4.pdf [file NIHMS1829526-supplement-4.pdf]

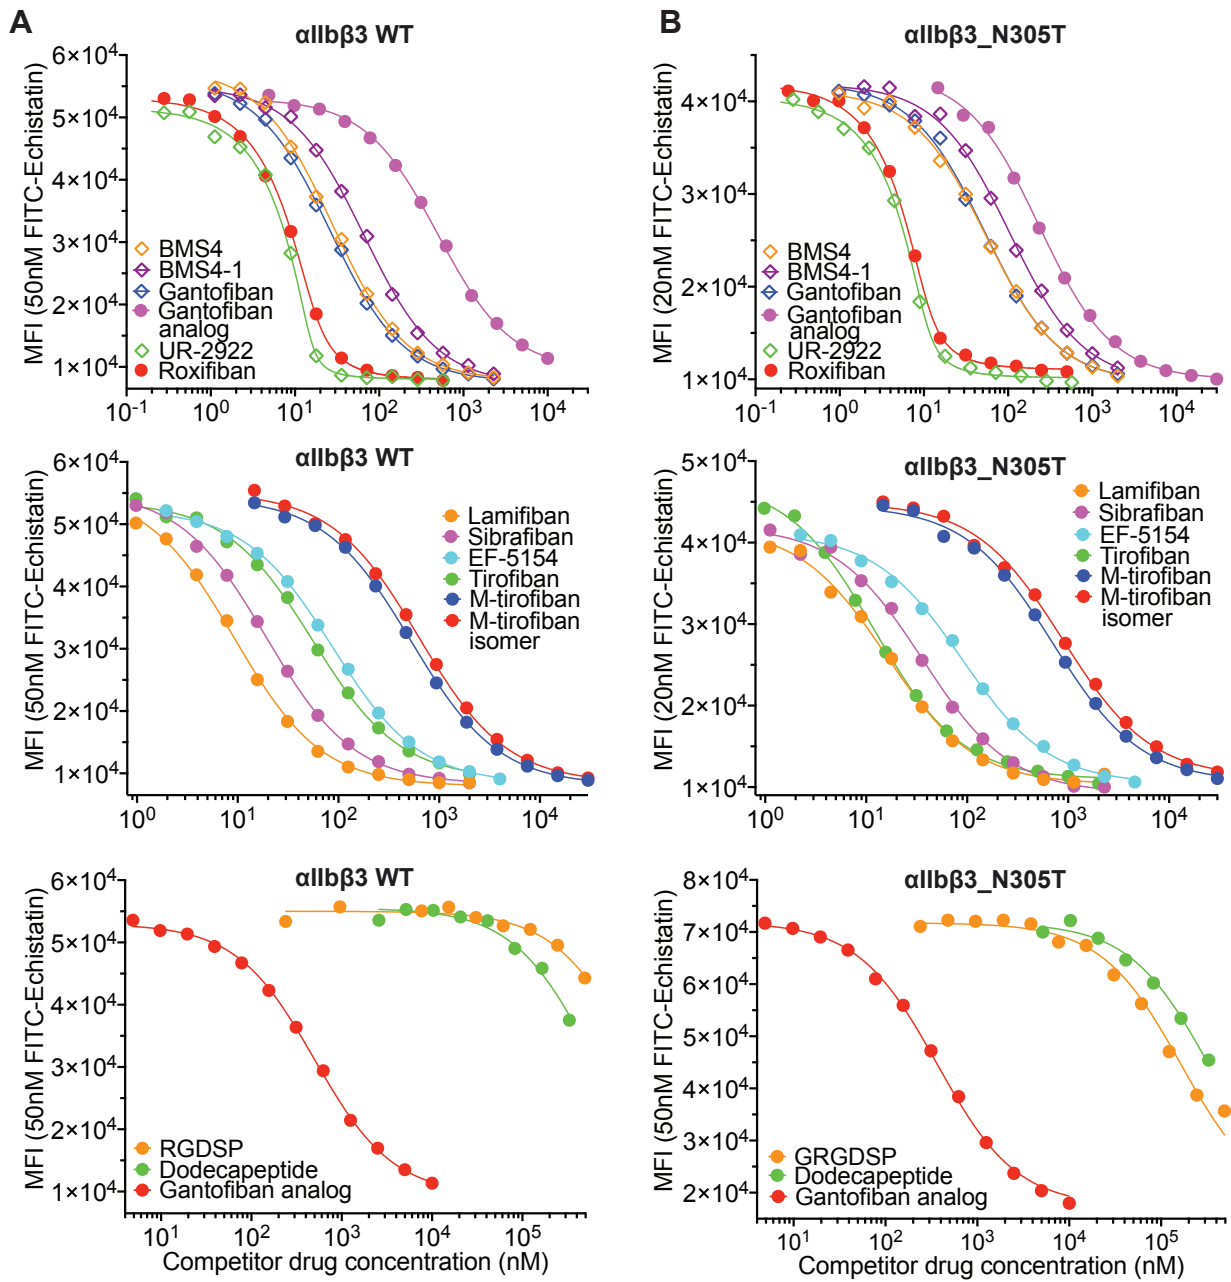

**Figure S3. Related to Fig. 6. Competitive binding to measure the affinity of allb $\beta$ 3 inhibitors.** allb $\beta$ 3 inhibitors competed the concentration of FITC-Echistatin shown on the y-axis for binding to allb $\beta$ 3 WT (A) and to allb $\beta$ 3\_N305T (B) expressed on transiently transfected Expi293F  $\alpha$ 5 &  $\alpha$ V KO cells. Mean fluorescence intensity (MFI) was determined by flow cytometry without washing in L15 medium with 0.1% BSA. Competitive binding curves were fitted to Eq.4 in Methods.
